# Supplementary material for: Blockade of TGF-β/Smad signaling by the small compound HPH-15 ameliorates experimental skin fibrosis
Source: Springer Nature journal article supplement (doi:10.1186/s13075-018-1534-y), 2018-03-15
Supplement: MOESM3 [file 15538196]

**NaCl**

**BLM**

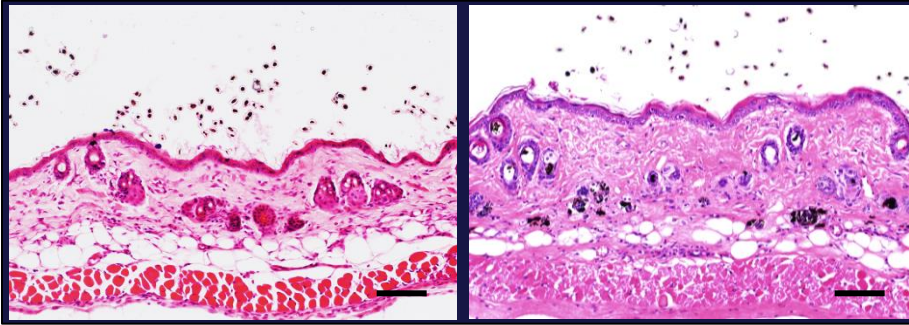

**Supplemental figure 3**  
**Luong VH, et al**
