# Supplementary material for: Blockade of TGF-β/Smad signaling by the small compound HPH-15 ameliorates experimental skin fibrosis
Source: Springer Nature journal article supplement (doi:10.1186/s13075-018-1534-y), 2018-03-15
Supplement: MOESM4 [file 15538196]

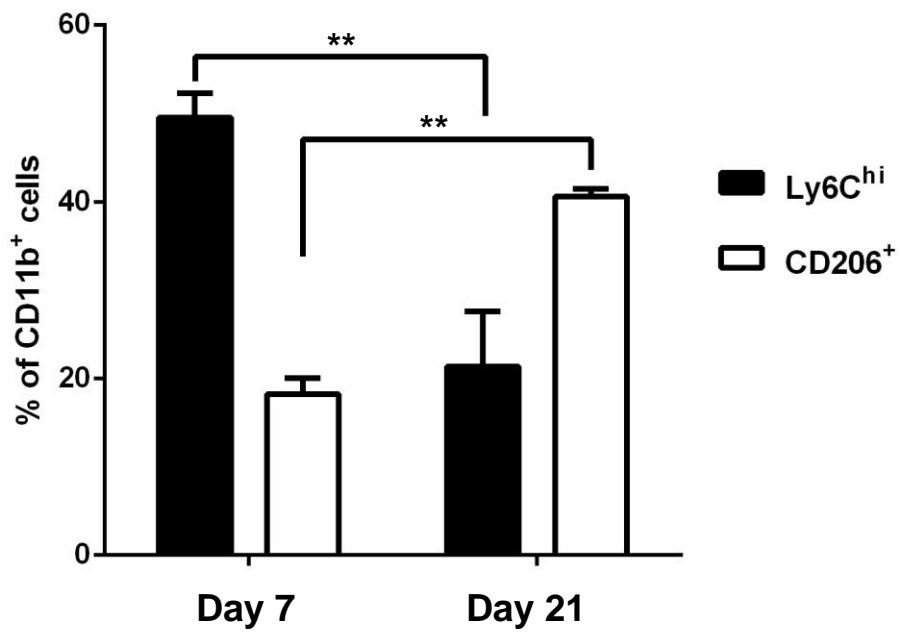

**Supplemental figure 4**  
**Luong VH, et al**
